# Supplementary material for: Hydrophobicity-driven self-assembly of protein and silver nanoparticles for protein detection using surface-enhanced Raman scattering
Source: Royal Society of Chemistry journal article supplement (doi:10.1039/c3an00025g), 2013-01-01
Supplement: c3an00025g.pdf [file c3an00025g.pdf]

## Supplementary Information

### **Hydrophobicity-driven self-assembly of protein and silver nanoparticles for protein detection using surface-enhanced Raman scattering**

Mehmet Kahraman<sup>1,2\*</sup>, Ben N. Balz<sup>1,3</sup>, and Sebastian Wachsmann-Hogiu<sup>1,4\*</sup>

<sup>1</sup> Center for Biophotonics Science and Technology, University of California Davis, Sacramento, CA, 95817, USA.

<sup>2</sup> Department of Chemistry, Faculty of Arts and Sciences, University of Gaziantep, 27310 Sehitkamil / *Gaziantep*, Turkey.

<sup>3</sup> Bielefeld University, Bielefeld, Germany.

<sup>4</sup> Department of Pathology and Laboratory Medicine, University of California Davis, Sacramento, CA, 95817, USA.

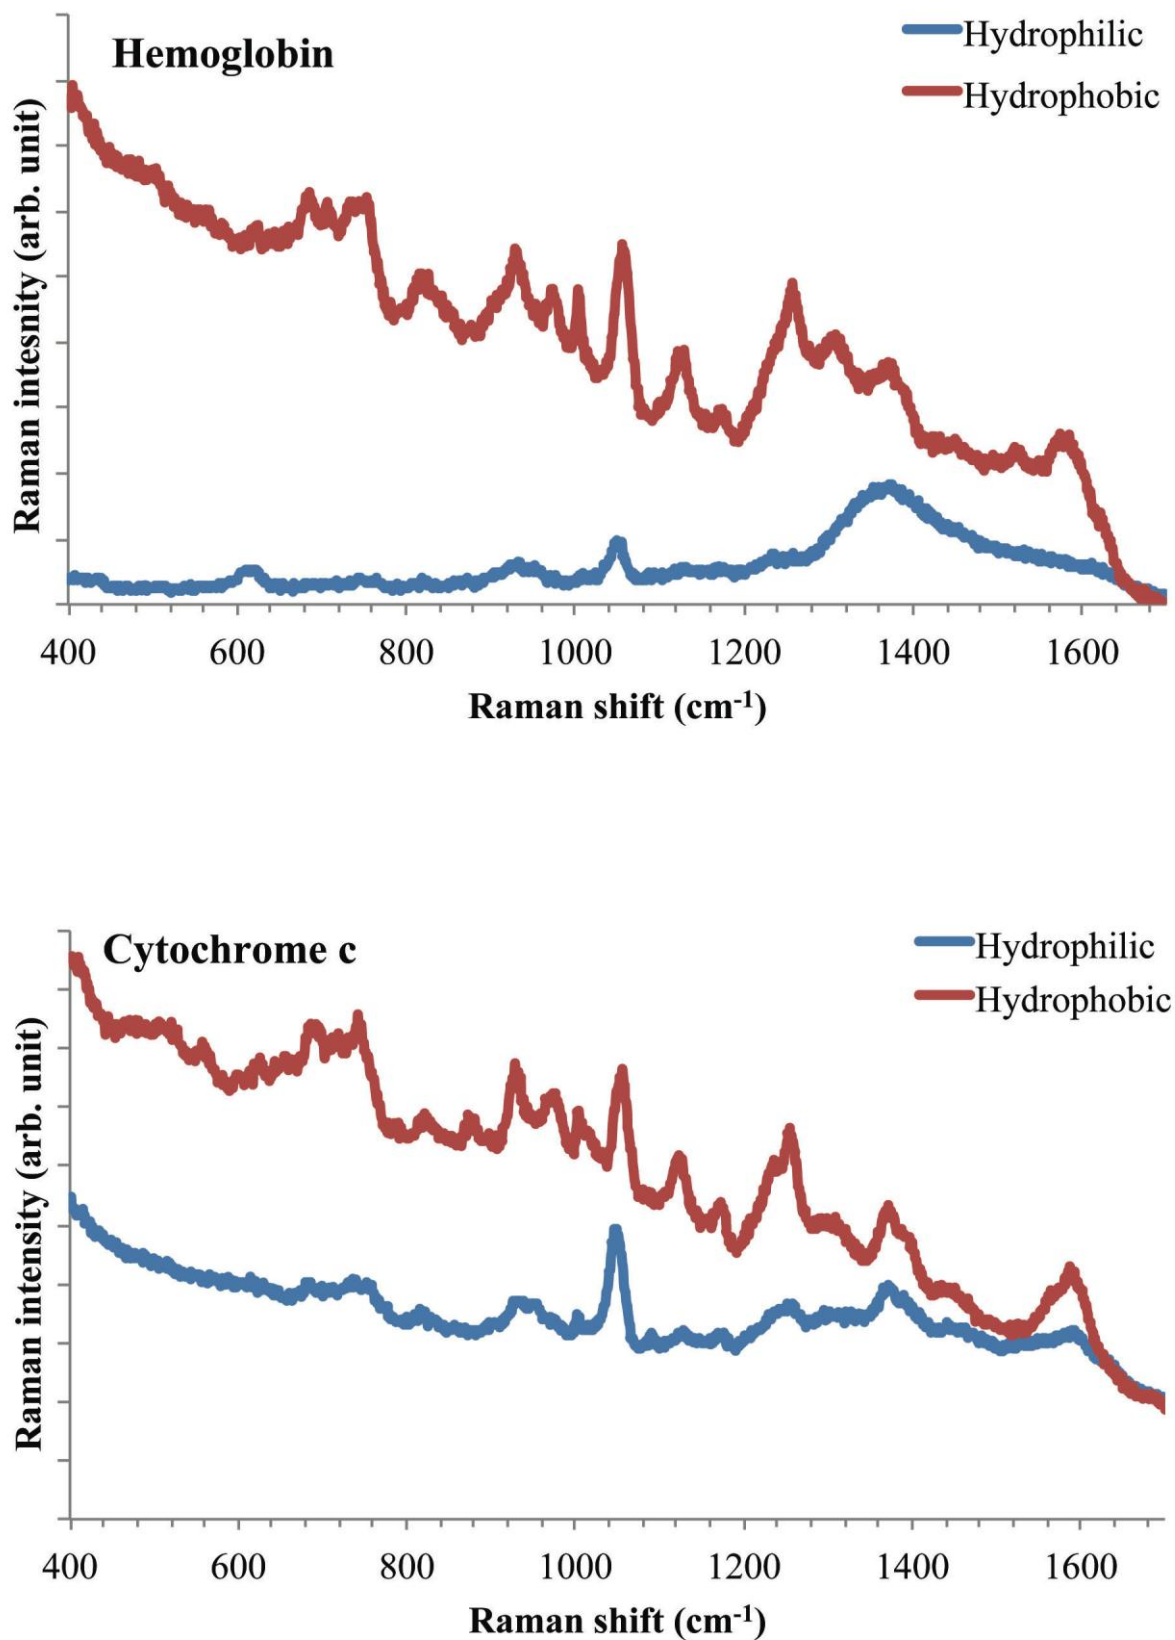

**Figure 1.** Comparison of SERS spectra obtained from the mixture of 50  $\mu\text{g/mL}$  of hemoglobin and cytochrome c and 16X AgNPs dropped onto hydrophilic and hydrophobic surfaces.

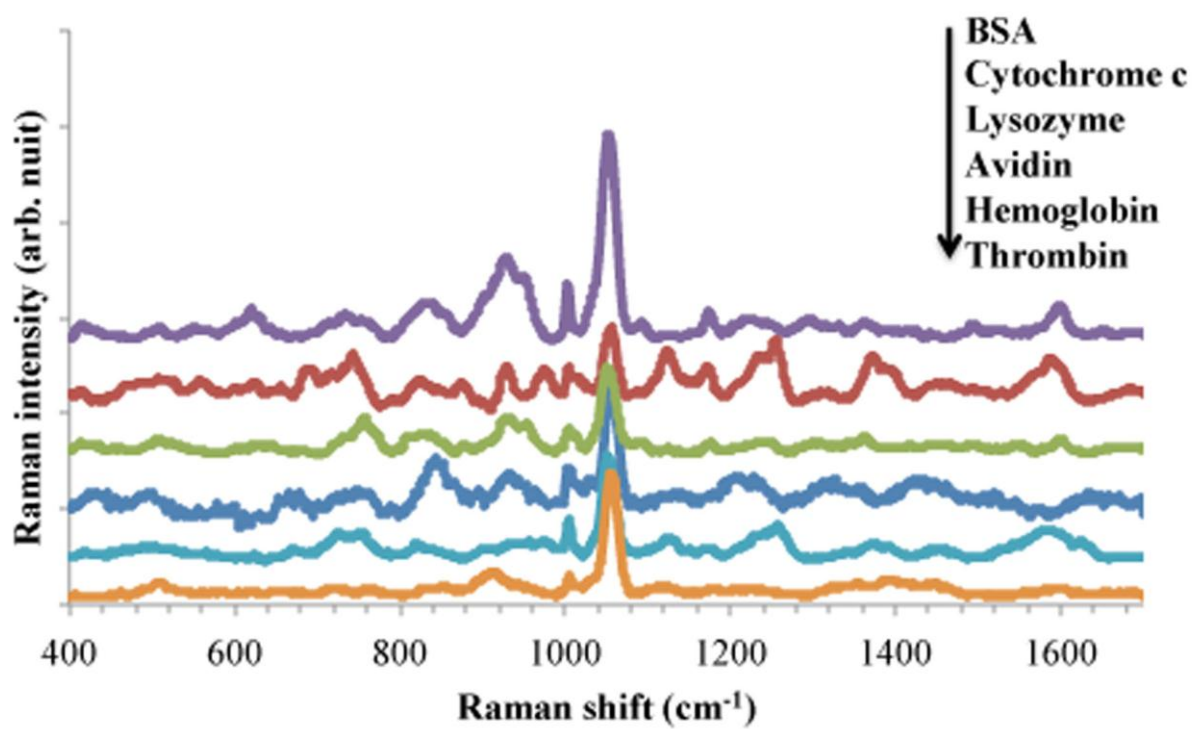

Figure 2. SERS spectra of each protein obtained from the mixture of 16X AgNPs and 50  $\mu\text{g/mL}$  protein solutions.

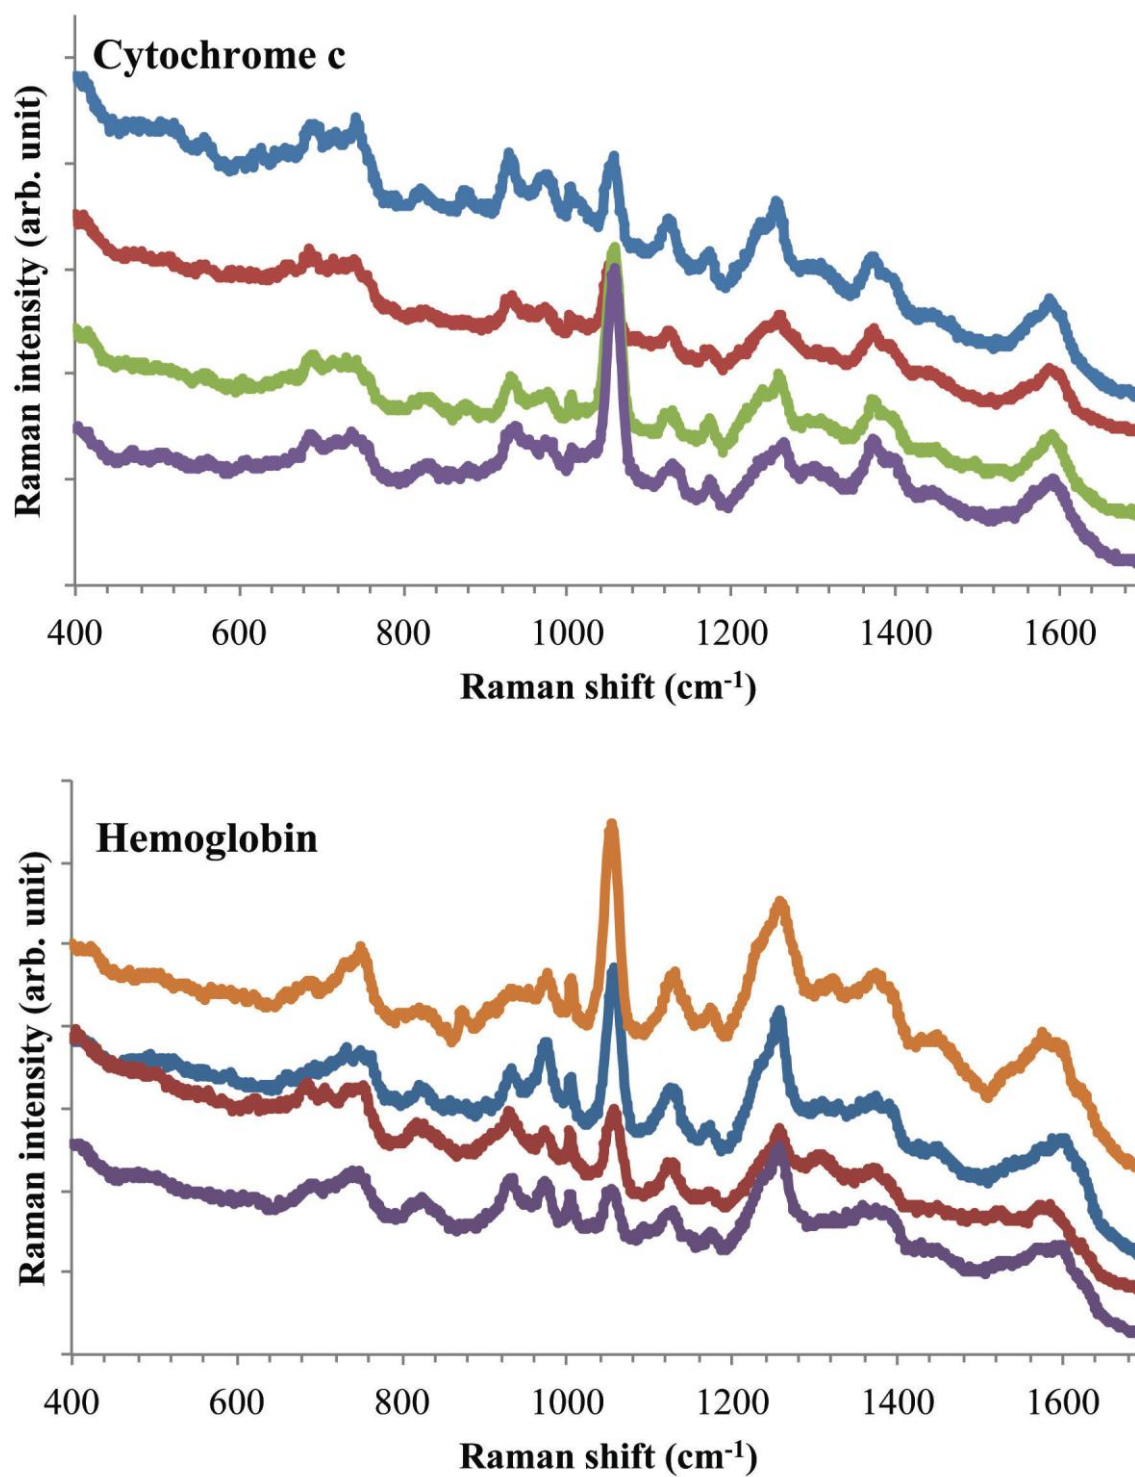

**Figure 3.** SERS spectra obtained from the mixture of 50  $\mu\text{g/mL}$  of cytochrome c and hemoglobin using different protein stock solutions and 16X AgNPs prepared in different days.
